# Supplementary material for: Reversible transformations of sulfamethoxazole and its submoieties by manganese-oxidizing bacteria and biogenic manganese oxides in the presence of humic substances
Source: Royal Society of Chemistry journal article supplement (doi:10.1039/d4em00593g), 2025-01-01
Supplement: d4em00593g1.xlsx [file d4em00593g1.xlsx]

## Sheet: SMX+SAH
SMX	t, h	SMX, mg/L		SAH	t, h	SAH, mg/L		Mn	t, h	Mn, mg/L
Bio	2.62	8.1921		Bio	2.62	8.99345		Bio	2.62	2.98947
Bio	2.62	10.6923		Bio	2.62	11.3585		Bio	2.62	6.21795
Bio	2.62	10.5745		Bio	2.62	8.08804		Bio	2.62	10.7136
Bio	4.62	10.1732		Bio	4.62	5.97628		Bio	4.62	9.99018
Bio	4.62	8.24629		Bio	4.62	5.26912		Bio	4.62	8.72274
Bio	4.62	8.88536		Bio	4.62	5.70547		Bio	4.62	10.1978
Bio	7.93	8.37362		Bio	7.93	0.988578		Bio	7.93	12.3681
Bio	7.93	3.8146		Bio	7.93	0.7191		Bio	7.93	11.0589
Bio	7.93	8.53801		Bio	7.93	0.669611		Bio	7.93	12.7477
Bio	11.83	7.48151		Bio	11.83	0.1		Bio	11.83	12.8139
Bio	11.83	4.1944		Bio	11.83	0.215992		Bio	11.83	13.7645
Bio	11.83	6.84232		Bio	11.83	0.207585		Bio	11.83	13.8222
Bio	24.08	6.20437		Bio	24.08	0.1		Bio	24.08	13.844
Bio	24.08	4.2349		Bio	24.08	0.1		Bio	24.08	13.4044
Bio	24.08	8.3307		Bio	24.08	0.1		Bio	24.08	13.8534
Bio	35.77	3.38485		Bio	35.77	0.1		Bio	35.77	13.1069
Bio	35.77	6.7613		Bio	35.77	0.1		Bio	35.77	13.3925
Bio	35.77	5.4795		Bio	35.77	0.1		Bio	35.77	13.4136
Bio	48.5	4.43352		Bio	48.5	0.1		Bio	48.5	12.8544
Bio	48.5	8.23752		Bio	48.5	0.1		Bio	48.5	13.3731
Bio	48.5	7.90944		Bio	48.5	0.1		Bio	48.5	13.6986
noMnOx	48.5	11.0258		noMnOx	48.5	0.1		noMnOx	48.5	0.210213
noMnOx	48.5	10.2902		noMnOx	48.5	0.1		noMnOx	48.5	0.0573734
noMnOx	48.5	10.8762		noMnOx	48.5	0.1		noMnOx	48.5	0.0142833
Abio	49.33	11.0523		Abio	49.33	13.8407		Abio	49.33	11.1267
Abio	49.33	10.0978		Abio	49.33	13.1553		Abio	49.33	10.4552
Abio	49.33	5.60007		Abio	49.33	8.08866		Abio	49.33	8.89585
Neg	49.08	11.9041		Neg	49.08	14.9063		Neg	49.08	13.7994
Neg	49.08	11.5748		Neg	49.08	14.6978		Neg	49.08	13.9688
Neg	49.08	11.5532		Neg	49.08	11.2428		Neg	49.08	13.8415
DCF	49.33	0.85075		DCF	49.33	0.85075		DCF	49.33	0.254551
DCF	49.33	0.32535		DCF	49.33	0.32535		DCF	49.33	0.0650256
DCF	49.33	0.41517		DCF	49.33	0.41517		DCF	49.33	0.0204771
at room temp, no shaking	49.08	10.2431		at room temp, no shaking	49.08	0.1		at room temp, no shaking	49.08	12.4196
at room temp, no shaking	49.08	6.40433		at room temp, no shaking	49.08	0.1		at room temp, no shaking	49.08	12.5944
at room temp, no shaking	49.08	5.77862		at room temp, no shaking	49.08	0.1		at room temp, no shaking	49.08	12.3807
TPs data		x	Bio wo Mn2+	Abio+MnOx	No MOB	BioDCF	7A, no shaking								x
	RT	K0A	K1A	K2A	K3A	K4a	K5A	1A	2A	3A	4A	5A	6A	7A	8A
SMX	6.41		143000	213000	252000		137000	80000	144000	66500	60000	7300	28300	63800
SAH	5.29			1180000	2000000		7800	1170000	326000	5400
TP230	8.12		2500000	1800000	2900000				1600000	2900000	2000000	2700000
TP285	8.78			610000							600000		580000
TP404	8.13						16000000	3800000					6000000	760000
TP418	8.52						1700000						400000
TP283	3.97						20000000

## Sheet: ISX+SAH
ISX	t, h	ISX, mg/L		SAH	t, h	SAH, mg/L		Mn	t, h	Mn, mg/L
Bio	1.92	9.84387		Bio	1.92	6.42913		Bio	1.92	0.28501
Bio	1.92	9.77294		Bio	1.92	7.29021		Bio	1.92	0.19609
Bio	1.92	9.71479		Bio	1.92	7.59205		Bio	1.92	0.389763
Bio	3.92	9.58918		Bio	3.92	2.27075		Bio	3.92	1.36669
Bio	3.92	9.57375		Bio	3.92	2.15619		Bio	3.92	1.69367
Bio	3.92	9.50426		Bio	3.92	2.21126		Bio	3.92	1.047
Bio	7.92	9.44601		Bio	7.92	0.443072		Bio	7.92	3.45552
Bio	7.92	9.41318		Bio	7.92	0.33705		Bio	7.92	4.35929
Bio	7.92	9.67551		Bio	7.92	0.500938		Bio	7.92	3.93034
Bio	11.97	9.50608		Bio	11.97	0.34056		Bio	11.97	3.66554
Bio	11.97	9.37591		Bio	11.97	0.446941		Bio	11.97	3.57607
Bio	11.97	9.72107		Bio	11.97	0.366828		Bio	11.97	3.85956
Bio	23.92	9.18093		Bio	23.92	0.273275		Bio	23.92	3.74582
Bio	23.92	9.6338		Bio	23.92	0.27236		Bio	23.92	3.88125
Bio	23.92	9.6179		Bio	23.92	0.263762		Bio	23.92	4.04655
Bio	35.67	8.98792		Bio	35.67	0.272412		Bio	35.67	3.84577
Bio	35.67	9.30655		Bio	35.67	0.1		Bio	35.67	3.65622
Bio	35.67	9.80899		Bio	35.67	0.1		Bio	35.67	3.72866
Bio	48.38	8.82979		Bio	48.38	0.1		Bio	48.38	4.40523
Bio	48.38	9.7865		Bio	48.38	0.1		Bio	48.38	4.40059
Bio	48.38	9.04966		Bio	48.38	0.26838		Bio	48.38	3.64175
noMnOx	49.05	9.38958		noMnOx	49.05	0.210324		noMnOx	49.05	0.00297722
noMnOx	49.05	9.66904		noMnOx	49.05	0.2379		noMnOx	49.05	0.000204039
noMnOx	49.05	9.82596		noMnOx	49.05	0.239704		noMnOx	49.05	0.000703735
Abio	48.72	9.87168		Abio	48.72	11.2913		Abio	48.72	1.04199
Abio	48.72	9.73184		Abio	48.72	11.0667		Abio	48.72	1.42407
Abio	48.72	9.6837		Abio	48.72	10.273		Abio	48.72	1.46309
Neg	49.05	10.791		Neg	49.05	16.7311		Neg	49.05	3.68375
Neg	49.05	10.3534		Neg	49.05	17.1503		Neg	49.05	4.58948
Neg	49.05	10.9794		Neg	49.05	18.1333		Neg	49.05	4.23081
DCF	48.38	0.23552		DCF	48.38	0.1		DCF	48.38	0.256262
DCF	48.38	0.68652		DCF	48.38	0.1		DCF	48.38	0.0916074
DCF	48.38	0.433656		DCF	48.38	0.1		DCF	48.38	0.216169
TPs data		x	Bio wo Mn2+	Abio+MnOx	No MOB	BioDCF	Bio w/o SA
	RT	K0A	K1A	K2A	K3A	K4a	K5A	1A	2A	3A	4A	5A	6A	7A	8A
ISX	1.15		2550000	1940000	3390000		1910000	1530000	2090000	1360000	2520000	1070000	1700000	3680000
SA	5.37			3910000	8150000			2490000	879000	97500	30200	21900	37700
TP131	2.71		2000000
TP166	1.06				4900000
TP167	2.06		1900000
TP181	4.02								1700000
TP185	1.42		5000000
TP197	1.86		4000000	2700000			2500000	2300000	2000000	2000000	2500000	1250000	1900000	2000000
TP211	2.45		7500000	3200000			3100000	2600000	3200000	2400000	2500000	1800000	2000000	2000000
TP230	8.13			3600000	2800000		3100000		3200000		2700000	2500000	2400000
TP244	9.44						2700000	3200000	3100000	2500000	3000000	2700000	2900000	3000000
TP245	4.95		2000000	1500000	2000000		590000
TP249	6.88			10000000				10000000	4900000	8700000	10000000	6000000	4900000	1600000
TP263	7.67			6000000	2000000			2000000	2000000	3900000	1800000	2500000	10000	16000
TP274	8.87						9000000	6500000	4000000	4800000	4700000	7300000	6200000	7000000
TP277	8.82						4300000		6900000		2700000
TP301	8.84				13000000
TP343	2.63						4000000
TP376	6.34			8000000					4000000
TP397	8.02							9400000		5100000		5900000	5700000	4000000
TP399	6.33						5900000	4900000

## Sheet: SMX
SMX	t, h	SMX, mg/L		Mn	t, h	Mn, mg/L
Bio	2	9.50176		Bio	2	0.00411469
Bio	2	9.49187		Bio	2	0.0273832
Bio	2	9.54644		Bio	2	0.0381016
Bio	4	9.32736		Bio	4	0.00502785
Bio	4	9.36012		Bio	4	0.00651875
Bio	4	9.04628		Bio	4	0.00796636
Bio	8	9.25725		Bio	8	0.0046844
Bio	8	9.30353		Bio	8	0.00341044
Bio	8	9.30916		Bio	8	0.0154513
Bio	12	9.34246		Bio	12	0.00651226
Bio	12	9.4552		Bio	12	0.0158528
Bio	12	9.32009		Bio	12	0.0159882
Bio	24	9.13037		Bio	24	0.0288733
Bio	24	11.4157		Bio	24	0.0180187
Bio	24	9.30086		Bio	24	0.0405901
Bio	36	9.0473		Bio	36	0.00448152
Bio	36	9.07079		Bio	36	0.0085716
Bio	36	8.95432		Bio	36	0.00711828
Bio	48	8.6544		Bio	48	0.00710601
Bio	48	8.94499		Bio	48	0.0092471
Bio	48	8.64714		Bio	48	0.0149565
noMnOx	48	9.07908		noMnOx	48	0.0168116
noMnOx	48	9.35518		noMnOx	48	0.00498268
noMnOx	48	9.30349		noMnOx	48	0.0147652
Abio	48	9.43296		Abio	48	2.89303
Abio	48	9.47918		Abio	48	0.0848744
Abio	48	9.5652		Abio	48	2.57998
Neg	48	9.25891		Neg	48	9.90552
Neg	48	9.35119		Neg	48	10.2232
Neg	48	9.34146		Neg	48	10.1992
DCF	48	4.77126		DCF	48	0.035216
DCF	48			DCF	48
DCF	48			DCF	48
TPs data
		BioDCF	Bio wo Mn2+	Abio+MnOx	No MOB	x	x	x	x	x	x	x
	RT	K0A	K1A	K2A	K3A	K4a	K5A	1A	2A	3A	4A	5A	6A	7A
SMX	6.4		564000	194000	212000								316000	717000
TP319	4.85		950000
TP217	7.23		1000000
TP333	5.3		190000
TP230	5.44			750000
TP592	8.7			4400000
TP328	2.66				490000
TP231	1.22				1500000
TP263	1.79				260000
TP342	4.55				200000
TP211	3.82												150000	500000
TP518	4.58												200000
TP169	5.24												670000
TP381	8.79												160000
TP245	4.32												500000	450000
TP430	9.13													200000
TP162	6.07													50000
TP296	6.85													810000

## Sheet: SNM+SAH
SNM	t, h	SNM, mg/L		SAH	t, h	SAH, mg/L		Mn	t, h	Mn, mg/L
Bio	2.61667	5.66949		Bio	2.61667	5.37178		Bio	2.61667	5.96693
Bio	2.61667	5.95447		Bio	2.61667	6.29572		Bio	2.61667	8.07127
Bio	2.61667	5.71294		Bio	2.61667	5.6996		Bio	2.61667	9.94813
Bio	4.43333	4.12722		Bio	4.43333	0.973996		Bio	4.43333	12.1635
Bio	4.43333	4.01058		Bio	4.43333	1.55308		Bio	4.43333	13.9872
Bio	4.43333	4.49101		Bio	4.43333	2.27238		Bio	4.43333	16.639
Bio	8.333	3.32289		Bio	8.333	0.300858		Bio	8.333	0.245414
Bio	8.333	2.96251		Bio	8.333	0.333732		Bio	8.333	7.38056
Bio	8.333	3.32635		Bio	8.333	0.366712		Bio	8.333	17.4209
Bio	12.3833	2.45516		Bio	12.3833	0.27142		Bio	12.3833	4.09116
Bio	12.3833	3.47039		Bio	12.3833	0.345356		Bio	12.3833	3.21543
Bio	12.3833	3.36312		Bio	12.3833	0.1		Bio	12.3833	13.2893
Bio	24.5	3.29759		Bio	24.5	0.2646		Bio	24.5	2.9769
Bio	24.5	3.75435		Bio	24.5	0.1		Bio	24.5	5.49065
Bio	24.5	4.23056		Bio	24.5	0.1		Bio	24.5	3.88025
Bio	36.7333	3.53807		Bio	36.7333	0.1		Bio	36.7333	10.5326
Bio	36.7333	5.11768		Bio	36.7333	0.1		Bio	36.7333	11.4807
Bio	36.7333			Bio	36.7333			Bio	36.7333
TPs data		x	Bio wo Mn2+	Abio+MnOx	No MOB	BioDCF	bio w/o SA	only SA							x	x
	RT	K0A	K1A	K2A	K3A	K4a	K5A	K6A	1A	2A	3A	4A	5A	6A	7A	8A
SNM	1.27		241000	247000	464000		229000	175000	123000	52900	54400	123000	56900	+
SA	5.34			4730000	8890000				541000	141000		541000	8500	+
TP197			+	+		+	+	+			+
TP185			+
TP211			+	+	+	+	+	+			+
TP376			+			+
TP255			+
TP230			+	+	+		+	+		+	+	+	+	+
TP274			+	+		+	+	+	+			+
TP244			+	+	+	+	+	+	+		+	+	+	+
TP323				+				+	+	+	+	+	+	+
TP337				+					+	+	+	+	+
TP397				+		+			+	+
TP263					+
TP245					+			+						+
TP301					+									+
TP343							+
TP149							+
TP365									+
TP302											+
TP277													+	+

## Sheet: SAH
SAH	t, h	SAH, mg/L		Mn	t, h	Mn, mg/L
Bio	2.11667	7.04106		Bio	2.11667	3.07986
Bio	2.11667	7.09523		Bio	2.11667	3.3166
Bio	2.11667	6.99213		Bio	2.11667	3.28388
Bio	4.2	2.03596		Bio	4.2	7.45683
Bio	4.2	2.59487		Bio	4.2	7.32056
Bio	4.2	1.60596		Bio	4.2	8.35526
Bio	6.15	0.23112		Bio	6.15	12.347
Bio	6.15	0.46566		Bio	6.15	12.2744
Bio	6.15	0.82984		Bio	6.15	11.6346
Bio	8.11667	0.206228		Bio	8.11667	11.8453
Bio	8.11667	0.282768		Bio	8.11667	12.1309
Bio	8.11667	0.28881		Bio	8.11667	11.7346
Bio	10	0.20544		Bio	10	12.7177
Bio	10	0.217608		Bio	10	12.3122
Bio	10	0.222904		Bio	10	12.4002
Bio	20	0.157612		Bio	20	12.5279
Bio	20	0.217712		Bio	20	12.2465
Bio	20	0.213244		Bio	20	12.2483
Bio	24.5	0.135054		Bio	24.5	14.0023
Bio	24.5	0.19068		Bio	24.5	12.2822
Bio	24.5	0.138348		Bio	24.5	12.7359
Bio	25.2333	0.1337		Bio	25.2333	12.0515
Bio	25.2333	0.141456		Bio	25.2333	12.8448
Bio	25.2333			Bio	25.2333
noMnOx	24.5	0.22385		noMnOx	24.5	0.168668
noMnOx	24.5	0.145728		noMnOx	24.5	0.0851852
noMnOx	24.5	0.13096		noMnOx	24.5	0.14458
Abio	24.8333	12.5333		Abio	24.8333	7.21754
Abio	24.8333	11.8976		Abio	24.8333	6.14548
Abio	24.8333	13.9806		Abio	24.8333	11.7146
Neg	24.4167	16.2933		Neg	24.4167	24.5581
Neg	24.4167	16.665		Neg	24.4167	13.0879
Neg	24.4167	16.7064		Neg	24.4167	12.6962
DCF	24.8333	0.316864		DCF	24.8333	0.691423
DCF	24.8333	0.927338		DCF	24.8333	0.312568
DCF	24.8333	0.013202		DCF	24.8333	0.164871
TPs data		BioDCF	Bio wo Mn2+	Abio+MnOx	No MOB	8A, no shaking	x
	RT	K0A	K1A	K2A	K3A	K4a	K5A	1A	2A	3A	4A	5A	6A	7A	8A
SA			116000	4940000	3900000	51100		1960000	676000	53300	57800	52500	58700	18800	+
TP376			+					+	+	+	+	+	+	+	36900
TP230		+	+	+	+	+		+	+	+	+	+	+	+	+
TP277						+			+	+				+
TP244		+	+	+	+	+		+	+	+	+	+	+	+	+
TP302				+							+		+		+
TP274					+			+
TP397				+		+

## Sheet: ISX
ISX	t, h	SA, mg/L		Mn	t, h	Mn, mg/L
Bio	4	17.456		Bio	4	1.93379
Bio	4	17.6402		Bio	4	3.91818
Bio	4	17.7933		Bio	4	0.114788
Bio	8.25	17.4408		Bio	8.25	9.65766
Bio	8.25	17.0176		Bio	8.25	7.96407
Bio	8.25	17.3683		Bio	8.25	0.179971
Bio	12.25	17.1103		Bio	12.25	0.0365558
Bio	12.25	17.524		Bio	12.25	0.0160529
Bio	12.25	15.8943		Bio	12.25	0.00459186
Bio	24			Bio	24	0.0214251
Bio	24	17.2044		Bio	24	0.0242008
Bio	24	16.8184		Bio	24	0.0136704
Bio	36	16.1865		Bio	36	6.83093
Bio	36	16.5693		Bio	36	0.132197
Bio	36	16.6902		Bio	36	0.06466
Bio	48	16.5489		Bio	48	0.0245936
Bio	48	16.0831		Bio	48	0.0199999
Bio	48			Bio	48
Bio	60.83	16.2688		Bio	60.83	0.0169979
Bio	60.83	16.0538		Bio	60.83	0.0757829
Bio	60.83			Bio	60.83
TPs data
		BioDCF	Bio wo Mn2+	Abio+MnOx	No MOB	x	x	x	x	x	x	x			x
	RT	K0A	K1A	K2A	K3A	K4a	K5A	1A	2A	3A	4A	5A	6A	7A	8A
ISX	1.33		1290000	1910000	862000								1510000	750000
TP296	7.38		300000
TP197	1.87		300000	950000	188000									500000
TP261	2.06		400000											800000
TP185	3.18												190000

## Sheet: SNM
SNM	t, h	SNM, mg/L		Mn	t, h	Mn, mg/L
Bio	4	10.818		Bio	4	0.127419
Bio	4	11.4944		Bio	4	0.076798
Bio	4	11.0496		Bio	4	0.0455042
Bio	8	10.0588		Bio	8	0.0146839
Bio	8	10.0247		Bio	8	0.0354974
Bio	8	10.4068		Bio	8	0.0196237
Bio	12	9.78438		Bio	12
Bio	12	10.0437		Bio	12	0.0295131
Bio	12	10.1126		Bio	12	0.0189876
Bio	24	10.2636		Bio	24	0.0219445
Bio	24	10.3382		Bio	24	0.0191162
Bio	24			Bio	24
Bio	36	10.3232		Bio	36	0.00771084
Bio	36	10.0118		Bio	36	0.0622607
Bio	36			Bio	36
Bio	48	9.9513		Bio	48	0.0702454
Bio	48	10.2963		Bio	48	0.589565
Bio	48			Bio	48
Bio	60	10.4766		Bio	60	0.0144911
Bio	60	10.2135		Bio	60	0.0617296
Bio	60			Bio	60
noMnOx	60	10.6247		noMnOx	60	11.8049
noMnOx	60	11.262		noMnOx	60	11.9729
noMnOx	60	10.7904		noMnOx	60	11.9143
Abio	60	11.0934		Abio	60	3.17797
Abio	60	10.8953		Abio	60	4.98188
Abio	60			Abio	60
Neg	60	11.0525		Neg	60	0.0788854
Neg	60	11.2091		Neg	60	0.0162519
Neg	60	10.7764		Neg	60	0.0283097
DCF	60	0.257632		DCF	60	0.00434147
DCF	60	4.9755		DCF	60	0.0270591
DCF	60	1.57153		DCF	60	0.0525304
TPs data
		BioDCF	Bio wo Mn2+	Abio+MnOx	No MOB	x	x	x	x	x	x	x			x
	RT	K0A	K1A	K2A	K3A	K4a	K5A	1A	2A	3A	4A	5A	6A	7A	8A
SFN	1.24		99000	66700	112000								75300	72700
TP166	1.1		150000	4.4
TP270	1.11			790000	1400000
TP239	0.92												15000000	4800000

## Sheet: Sulfonamides pretest
	Substance	Sample	Conc., mg/L	Conc. norm. for V
1	Sulfadiazine, SDZ	1a
		1b	16.2708	9.43706
		1c	14.7628	9.15294
		1K1	14.2196	10.3803
		1K2	11.994	10.2429
2	Sulfadimethoxine, SDM	2a	2.8826	1.5566
		2b	2.5732	1.54392
			2.5998	1.53388
		2K1	2.6713	1.81648
		2K2	2.2804	1.77871
3	Sulfamerazine, SMR	3a	14.4465	7.80111
		3b	18.8267	11.6726
		3c	11.849	7.1094
		3K1	12.547	9.53572
		3K2	11.9352	9.07075
4	Sulfamethazine, SMZ	4a	15.0585	8.43276
		4b	15.8978	8.90277
		4c	13.9207	8.90925
		4K1	14.0824	10.1393
		4K2	12.9965	9.56542
5	Sulfamethizole, SMI	5a	12.9626	8.03681
		5b	16.0752	9.00211
		5c	13.7649	8.80954
		5K1	13.2062	10.0367
		5K2	12.0936	9.19114
6	Sulfapyridine, SPD	6a	13.0911	7.72375
		6b	13.5509	8.40156
		6c	14.3385	8.31633
		6K1	13.8512	9.69584
		6K2	13.6444	10.2333
7	Sulfathiazole, STZ	7a	13.7986	8.41715
		7b	13.4998	8.36988
		7c	12.5904	8.05786
		7K1	12.8062	9.73271
		7K2	13.1795	10.4118
10	Diclofenac control	10a	6.9552	4.45133
		10b	2.6242	1.46955
		10c	2.6027	1.19724
		10K1	13.1038	9.56577
		10K2	12.5119	9.48402

## Sheet: Determination of SAH-SMX ratio
Variants	Type	Compounds	Concentrations	Doses per 50 mL	Sampling time	Volume [mL]	SMX, mg/L	SA, mg/L	DCF, mg/L	SMX normalized for V	SA normalized for V	DCF normalized for V	SMX AV	SMX SD	SA AV	SA AV	DCF AV	DCF SD
1A	Active MOB	SMX no SA	10 mg/L SMX	SMX 3.57 mL EtOH 1.6 mL	14:30 (1.7) 15:22 (3.7)	38.3	11.9421			9.14765	0		9.13395	0.169835	0	0
1B						38.5	12.0734			9.29652	0
1C						38.8	11.5434			8.95768	0
2A		SMX +SA2	10 mg/L SMX + 14.5 mg/L SA	SMX 3.57 mL SA 0.45 g/L (in ETOH) 1.6 mL	14:37 (1.7) 15:04 (3.7)	39.8	2.6231			2.08799	0		2.35183	0.228652	0	0
2B						38.5	3.2366			2.49218	0
2C						39	3.1735			2.47533	0
3A		SMX+SA20	10 mg/L SMX + 145 mg/L SA	SMX 3.57 mL SA 4.5 g/L (in ETOH) 1.6 mL	14:43 (1.7) 15:04 (3.7)	41	2.0867			1.71109	0		1.37194	0.299591	0	0
3B						42	1.3611			1.14332	0
3C						42.5	1.484			1.2614	0
4A	CTRL without Mn2+	SMX no SA	10 mg/L SMX	SMX 3.57 mL EtOH 1.6 mL	14:30 (1.7) 15:40 (3.7)	40	11.8992			9.51936	0		9.09259	0.905144	0	0
4B						40	10.0662			8.05296	0
4C						39.7	12.2235			9.70546	0
5A		SMX +SA2	10 mg/L SMX + 14.5 mg/L SA	SMX 3.57 mL SA 0.45 g/L (in ETOH) 1.6 mL	14:37 (1.7) 15:40 (3.7)	40.7	11.6723			9.50125	0		9.20635	0.608338	0	0
5B						40.3	10.5543			8.50677	0
5C						42	11.4417			9.61103	0
6A		SMX+SA20	10 mg/L SMX + 145 mg/L SA	SMX 3.57 mL SA 4.5 g/L (in ETOH) 1.6 mL	14:43 (1.7) 15:40 (3.7)	36.5	12.7521			9.30903	0		8.02673	1.46407	0	0
6B						37.3	8.6213			6.43149	0
6C						40.5	10.2959			8.33968	0
7A	CTRL abiotic (85 for 10 min)	SMX no SA	10 mg/L SMX	SMX 3.57 mL EtOH 1.6 mL	15:13 (1.7) 16:35 (3.7)	42	11.6243			9.76441	0		9.81078	0.0580748	0	0
7B						41	12.0438			9.87592	0
7C						36.7	13.3406			9.792	0
8A		SMX +SA2	10 mg/L SMX + 14.5 mg/L SA	SMX 3.57 mL SA 0.45 g/L (in ETOH) 1.6 mL	15:13 (1.7) 16:17 (3.7)	42.8	3.9182	10.6015		3.35398	9.07488		2.70751	0.611209	7.19876	1.64215
8B						41	3.2067	7.9256		2.62949	6.49899
8C						41	2.6086	7.3444		2.13905	6.02241
9A		SMX+SA20	10 mg/L SMX + 145 mg/L SA	SMX 3.57 mL SA 4.5 g/L (in ETOH) 1.6 mL	15:13 (1.7) 16:17 (3.7)	40.8	0.7633	162.632		0.622853	132.708		0.659418	0.122936	131.048	1.61679
9B						42	0.9482	155.904		0.796488	130.959
9C						41	0.6816	157.9		0.558912	129.478
10A	Diclofenac active control			0.5 mL DCF	14:59 (1.7) 15:58 (3.7)	36			0.2598	0	0	0.187056					0.155063	0.0290845
10B						35			0.2113	0	0	0.14791
10C						34.8			0.1871	0	0	0.130222
11A				0.5mL DCF 1.6mL EtOH	14:59 (1.7) 15:58 (3.7)	38			0.648	0	0	0.49248					0.545574	0.0923727
11B						37.8			0.6508	0	0	0.492005
11C						37			0.8814	0	0	0.652236
