# Supplementary material for: Reversible transformations of sulfamethoxazole and its submoieties by manganese-oxidizing bacteria and biogenic manganese oxides in the presence of humic substances
Source: Royal Society of Chemistry journal article supplement (doi:10.1039/d4em00593g), 2025-01-01
Supplement: d4em00593g2.pdf [file d4em00593g2.pdf]

**Supporting Materials for**  
**Reversible transformations of sulfamethoxazole and its submoieties by manganese-oxidizing bacteria and biogenic manganese oxides in the presence of humic substances**

Adam Sochacki<sup>1\*</sup>, Hana Šubrtová Salmonová<sup>2</sup>, Sylwia Bajkacz<sup>3</sup>, Ewa Felis<sup>4</sup>, Lucie Schneider<sup>2</sup>, Zdeněk Chval<sup>5</sup>, Zuzana Vaňková<sup>6</sup>, Martin Lexa<sup>7</sup>, Michael Pohořelý<sup>8,9</sup>, Philippe François-Xavier Corvini<sup>10</sup>, Markéta Marečková<sup>2</sup>

<sup>1</sup>Czech University of Life Sciences Prague, Faculty of Environmental Sciences, Department of Applied Ecology, Kamýcká 129, 165 00 Prague 6, Czech Republic

<sup>2</sup>Czech University of Life Sciences Prague, Faculty of Agrobiological Sciences, Department of Microbiology, Nutrition and Dietetics, Kamýcká 129, Prague 6, 16500, Czech Republic

<sup>3</sup>Silesian University of Technology, Faculty of Chemistry, Department of Inorganic Chemistry, Analytical Chemistry and Electrochemistry, ul. M. Strzody 7, 44-100 Gliwice, Poland

<sup>4</sup>Silesian University of Technology, Faculty of Energy and Environmental Engineering, Environmental Biotechnology Department, ul. Akademicka 2, 44-100 Gliwice, Poland

<sup>5</sup>Institute of Laboratory Diagnostics and Public Health, Faculty of Health and Social Studies, University of South Bohemia, J. Boreckého 27, 37011, České Budějovice, Czech Republic

<sup>6</sup>Czech University of Life Sciences Prague, Faculty of Environmental Sciences, Department of Environmental Geosciences, Kamýcká 129, 165 00 Prague 6, Czech Republic

<sup>7</sup>Czech University of Life Sciences Prague, Faculty of Forestry and Wood Sciences, Department of Department of Wood Processing and Biomaterials, Kamýcká 129, 165 00 Prague 6, Czech Republic

<sup>8</sup>University of Chemistry and Technology, Prague, Faculty of Environmental Technology, Department of Power Engineering, Technická 5, Prague 16628, Czech Republic

<sup>9</sup>Czech Academy of Sciences, Institute of Chemical Process Fundamentals, Research Group of Waste Management and Sustainable Technologies, Rozvojová 135, Prague 16500, Czech Republic

<sup>10</sup>University of Applied Sciences and Arts Northwestern Switzerland. School of Life Sciences, , 4132 Muttenz, Switzerland

\*Corresponding author. Tel. +420 224 38 2993; E-mail address: sochacki@fzp.czu.cz

**ESI1** Substances used in the experiment as target contaminants and electron mediator (syringaldehyde) (Source: Kim et al., 2023; except electrophilicity index and ionisation potential calculated as described in Section 2.7 of the main text)

| Property                    | Shortened name and abbreviation used in this study                                |                                                                                   |                                                                                    |                                                                                     |                                                                                     |
|-----------------------------|-----------------------------------------------------------------------------------|-----------------------------------------------------------------------------------|------------------------------------------------------------------------------------|-------------------------------------------------------------------------------------|-------------------------------------------------------------------------------------|
|                             | Sulfamethoxazole (SMX)                                                            | Isoxazole (ISX)                                                                   | Sulfanilamide (SNM)                                                                | Syringaldehyde (SAH)                                                                | Diclofenac (DCF)                                                                    |
| IUPAC name                  | 4-amino-N-(5-methyl-1,2-oxazol-3-yl)benzenesulfonamide                            | 5-methyl-1,2-oxazol-3-amine                                                       | 4-aminobenzenesulfonamide                                                          | 4-hydroxy-3,5-dimethoxybenzaldehyde                                                 | 2-[2-(2,6-dichloroanilino)phenyl]acetic acid                                        |
| Molecular Formula           | C <sub>10</sub> H <sub>11</sub> N <sub>3</sub> O <sub>3</sub> S                   | C <sub>4</sub> H <sub>6</sub> N <sub>2</sub> O                                    | C <sub>6</sub> H <sub>8</sub> N <sub>2</sub> O <sub>2</sub> S                      | C <sub>9</sub> H <sub>10</sub> O <sub>4</sub>                                       | C <sub>14</sub> H <sub>11</sub> Cl <sub>2</sub> NO <sub>2</sub>                     |
| Molecular Structure         | 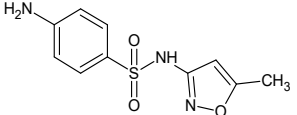 |  |  |  |  |
| CAS no.                     | 723-46-6                                                                          | 1072-67-9                                                                         | 63-74-1                                                                            | 134-96-3                                                                            | 15307-86-5                                                                          |
| pKa                         | pKa1 = 1.6; pKa2 = 5.7                                                            | 2.5                                                                               | 10.6                                                                               | 7.30                                                                                | 4.15                                                                                |
| log K <sub>ow</sub>         | 0.89                                                                              | 0.10                                                                              | -0.62                                                                              | 1.07                                                                                | 4.51                                                                                |
| Molecular weight            | 253.28                                                                            | 98.10                                                                             | 172.21                                                                             | 182.17                                                                              | 296.1                                                                               |
| Electrophilicity index (eV) | pH4.5                                                                             | 2.813                                                                             | 2.195                                                                              | 2.565                                                                               | 4.361                                                                               |
|                             | pH 7.5                                                                            | 2.238                                                                             | 2.184                                                                              | 2.561                                                                               | 3.857                                                                               |
| Ionisation potential (eV)   | pH4.5                                                                             | 6.172                                                                             | 6.711                                                                              | 6.184                                                                               | 6.394                                                                               |
|                             | pH 7.5                                                                            | 5.673                                                                             | 6.700                                                                              | 6.178                                                                               | 5.878                                                                               |

**ESI2** Substances used in the experiment as micropollutants or electron mediator (syringaldehyde). All substances were purchased from Sigma Aldrich (Czech Republic)

|                  | Substance                                  | Purity                   | Concentration, mg/L                                           |
|------------------|--------------------------------------------|--------------------------|---------------------------------------------------------------|
| Redox mediator   | Syringaldehyde                             | 98%                      | Added in a molar 2:1 or 20:1, syringaldehyde:target substance |
| Positive control | Diclofenac, DCF                            | Sodium salt, $\geq 98\%$ | 10                                                            |
| Sulfonamides     | Isoxazole, ISX (3-Amino-5-methylisoxazole) | $\geq 97\%$              | 10                                                            |
|                  | Sulfadiazine, SDZ                          | 99.0-101.0%              | 10                                                            |
|                  | Sulfadimethoxine, SDM                      | 98.0-102.0%              | 2                                                             |
|                  | Sulfamerazine, SMR                         | $\geq 99\%$              | 10                                                            |
|                  | Sulfamethazine, SMZ                        | 99.0-101.0%              | 10                                                            |
|                  | Sulfamethizole, SMI                        | $\geq 99\%$              | 10                                                            |
|                  | Sulfamethoxazole, SMX                      | $\geq 98\%$              | 10                                                            |
|                  | Sulfanilamide, SFN                         | $\geq 98\%$              | 10                                                            |
|                  | Sulfapyridine, SPD                         | $\geq 99\%$              | 10                                                            |
|                  | Sulfathiazole, STZ                         | 99.0-101.0%              | 10                                                            |

**ESI3** Components of the growth medium for *Pseudomonas putida* MnB6

All reagents were used as received without further purification. Yeast extract was purchased from Oxoid; casamino acids from Difco™; HEPES and  $\text{CoCl}_2 \cdot 6 \text{H}_2\text{O}$  from VWR Chemicals; D-glucose,  $\text{CaCl}_2$ ,  $\text{MgSO}_4$ ,  $\text{FeCl}_3$  and  $\text{CoCl}_2 \cdot 6 \text{H}_2\text{O}$  from Lach-Ner;  $\text{CuSO}_4 \cdot 5 \text{H}_2\text{O}$  from Penta; and  $\text{ZnSO}_4 \cdot 7 \text{H}_2\text{O}$  and  $\text{MnCl}_2$  from Sigma-Aldrich.

| Compound                                             | Supplier      | CAS Number | Dosage per 1 L    |
|------------------------------------------------------|---------------|------------|-------------------|
| Yeast extract                                        | Oxoid         |            | 0.5 g             |
| Casamino acids                                       | Difco™        |            | 0.5 g             |
| HEPES                                                | VWR Chemicals | 7365-45-9  | 5mM               |
| D-Glucose                                            | Lach-Ner      | 50-99-7    | 10 mM             |
| $\text{CaCl}_2$                                      | Lach-Ner      | 10043-52-4 | 0,48 mM           |
| $\text{MgSO}_4$                                      | Lach-Ner      | 7487-88-9  | 0,83 mM           |
| $\text{FeCl}_3$                                      | Lach-Ner      | 7705-08-0  | 3.7 $\mu\text{M}$ |
| $\text{CuSO}_4 \cdot 5 \text{H}_2\text{O}$           | Penta         | 7758-99-8  | 10 mg             |
| $\text{ZnSO}_4 \cdot 7 \text{H}_2\text{O}$           | Sigma-Aldrich | 7446-20-0  | 44 mg             |
| $\text{CoCl}_2 \cdot 6 \text{H}_2\text{O}$           | Lach-Ner      | 7791-13-1  | 20 mg             |
| $\text{Na}_2\text{MoO}_4 \cdot 2 \text{H}_2\text{O}$ | VWR Chemicals | 10102-40-6 | 13 mg             |
| $\text{MnCl}_2$                                      | Sigma-Aldrich | 7773-01-5  | 29 mg             |

#### **ESI4 Additional information on the analysis of BioMnOx**

The BioMnOx obtained after 24-h cultivation was pretreated by 0.17% sodium hypochlorite (12% Cl, stabilized, technical, Carl Roth, Germany) in several iterative steps to eliminate the adsorbed organic fraction originating from the cultivation media. The cleaning procedure was based on the protocol of Villalobos et al. (2003). Scanning electron microscopy (SEM) of the samples was performed using a MIRA 3 electron microscope (Tescan Orsay Holding, Brno, Czech Republic) with a secondary electron detector operated at 12 kV acceleration voltage. The energy-dispersive X-ray spectroscopy (EDX) of the samples was conducted using an energy-dispersive spectroscopy system (Bruker XFlash X-ray detector, Karlsruhe, Germany, and ESPRIT 2 software). The photoelectron spectrum was measured by X-ray photoelectron spectroscopy (XPS) method (Kratos ESCA 3400, X-ray source MgK $\alpha$  120 W). A wide scan was performed using 0-1100 eV, 0.2 eV/step, 5x acquisitions, and then the identified elements were measured in high resolution (0.05 eV/step, 15x-30x acquisitions). Additionally, the Mn 3s region was separately measured to determine the oxidation state of manganese in the supplied sample (as received) and after Ar<sup>+</sup> ion sputtering. The C 1s 284.8 eV lines were used as calibration for the evaluation. The specific surface area was determined from the adsorption isotherm of N<sub>2</sub> at T = 77 K using the method of BET surface analysis (Coutler SA 3100 automatic analyzer, Beckman Coutler, Inc., Brea, CA, USA).

The X-ray diffraction (XRD) analysis was performed using a desktop diffractometer Bruker D2 Phaser with an LYNXEYE XE detector (CuK $\alpha$  radiation, 30 kV, 10 mA, and measuring increment step of 0.022° 2 $\theta$ , time step 2.5 s, in the range from 5° to 80° 2 $\theta$ ). The identification of all phases was performed using Diffrac. Suite EVA software (version 4.3) and the ICDD PDF-2 database (2018).

**ESI5** HPLC analysis details: all the analyses were performed with a mobile phase: A – acetonitrile, B- formic acid/0.01M ammonium formate, pH 3.3.

| Substance                                                  | Program<br>(isocratic or<br>gradient)<br>ACN/buffer                                     | Retention<br>time<br>[min]    | Wavelength<br>[nm]        | LOD/LOQ<br>[mg/L]                           | R <sup>2</sup>                  |
|------------------------------------------------------------|-----------------------------------------------------------------------------------------|-------------------------------|---------------------------|---------------------------------------------|---------------------------------|
| Diclofenac                                                 | Iso., 70/30                                                                             | 5.55                          | 283                       | 0.06/0.17                                   | 0.999                           |
| Isoxazole                                                  | Iso., 30/70                                                                             | 3.95                          | 220                       | 0.4/0.12                                    | 0.999                           |
| Sulfanilamide                                              | Iso., 30/70                                                                             | 3.92                          | 260                       | 0.02/0.05                                   | 0.999                           |
| Sulfamethoxazole                                           | Iso., 40/60                                                                             | 5.64                          | 269                       | 0.03/0.08                                   | 0.997                           |
| Syringaldehyde<br>and<br>Sulfamethoxazole                  | Iso., 30/70                                                                             | 5.71<br><br>8.06              | 307<br><br>269            | 0.22/0.66<br><br>0.03/0.08                  | 0.998<br><br>0.998              |
| Isoxazole<br>and<br>Sulfanilamide<br>and<br>Syringaldehyde | Gradient mode,<br>15/85 0-7 min<br>30/70 7-14 min<br>80/20 14-22 min<br>15/85 22-30 min | 5.06<br><br>4.66<br><br>12.11 | 260<br><br>220<br><br>307 | 0.02/0.07<br><br>0.07/0.11<br><br>0.20/0.66 | 0.995<br><br>0.998<br><br>0.993 |
| Sulfadiazine                                               | Iso., 30/70                                                                             | 5.92                          | 269                       | 0.04/0.13                                   | 0.995                           |
| Sulfadimethoxine                                           | Iso., 50/50                                                                             | 4.79                          | 271                       | 0.03/0.09                                   | 0.999                           |
| Sulfamerazine                                              | Iso., 30/70                                                                             | 4.92                          | 269                       | 0.02/0.07                                   | 0.999                           |
| Sulfapyridine                                              | Iso., 30/70                                                                             | 4.66                          | 266                       | 0.02/0.07                                   | 0.999                           |
| Sulfathiazole                                              | Iso., 30/70                                                                             | 4.39                          | 287                       | 0.02/0.07                                   | 0.999                           |
| Sulfamethizole                                             | Iso., 30/70                                                                             | 5.28                          | 282                       | 0.02/0.07                                   | 0.999                           |
| Sulfamethazine                                             | Iso., 30/70                                                                             | 5.48                          | 268                       | 0.03/0.08                                   | 0.996                           |

### ESI6 Identification of transformation products

The information-dependent acquisition (IDA) mode, combining EMS with EPI, was used to maximize the information obtained in one scan. Data recorded by the EMS-IDA-EPI method were collected in positive electrospray ionization (ESI+) and negative (ESI-) ionization modes, while the p-MRM method data were collected only in positive ionization mode. The EMS and EPI mass ranges were from  $m/z$  50 to  $m/z$  700, and the scan rates were 1000 Da/s. The IDA criteria were as follows: the trigger for EPI was the 1–2 most intense ions that exceeded 100 cps; the mass tolerance was 250 mDa; former target ions were excluded for 30 s after two occurrences; the maximum rolling collision energy allowed was 80 eV in ESI+ and -80 eV in ESI-; and the dynamic background subtraction was turned on. The presence of TPs in the samples identified by the p-MRM mode was confirmed by analyzing the mass spectra recorded in the EMS-IDA-EPI mode. Non-targeted analysis was performed using a retrospective approach to mass spectral analysis.

### ESI7 X-ray diffraction spectrum for MnOx used in the experiment

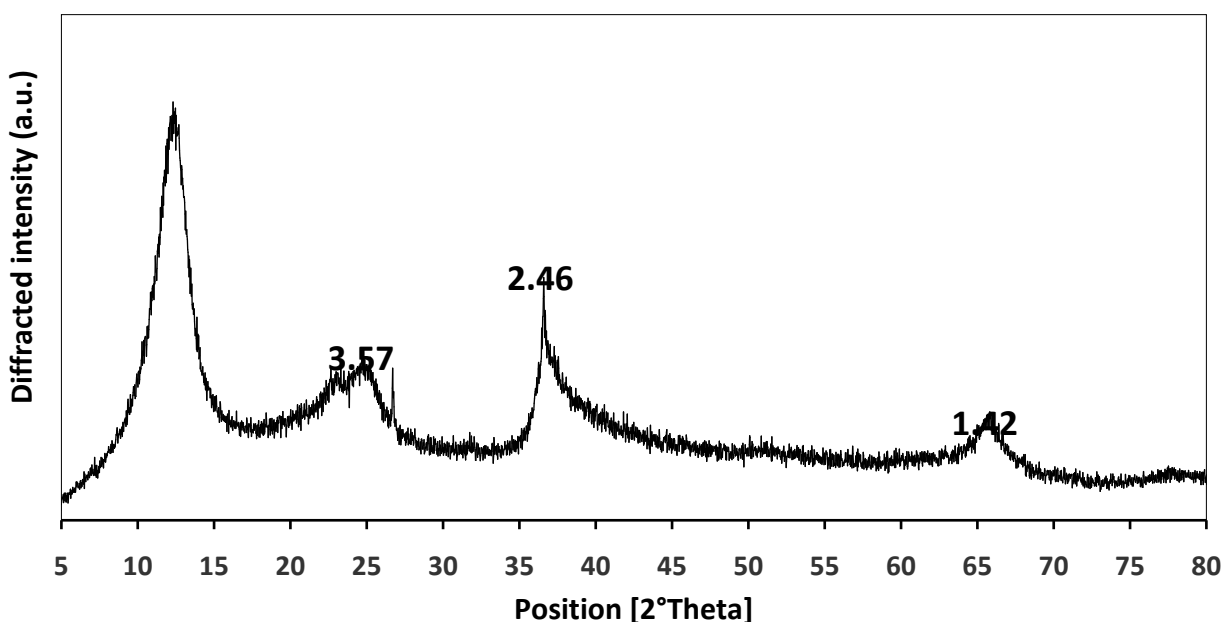

## ESI8 SEM-EDS analysis

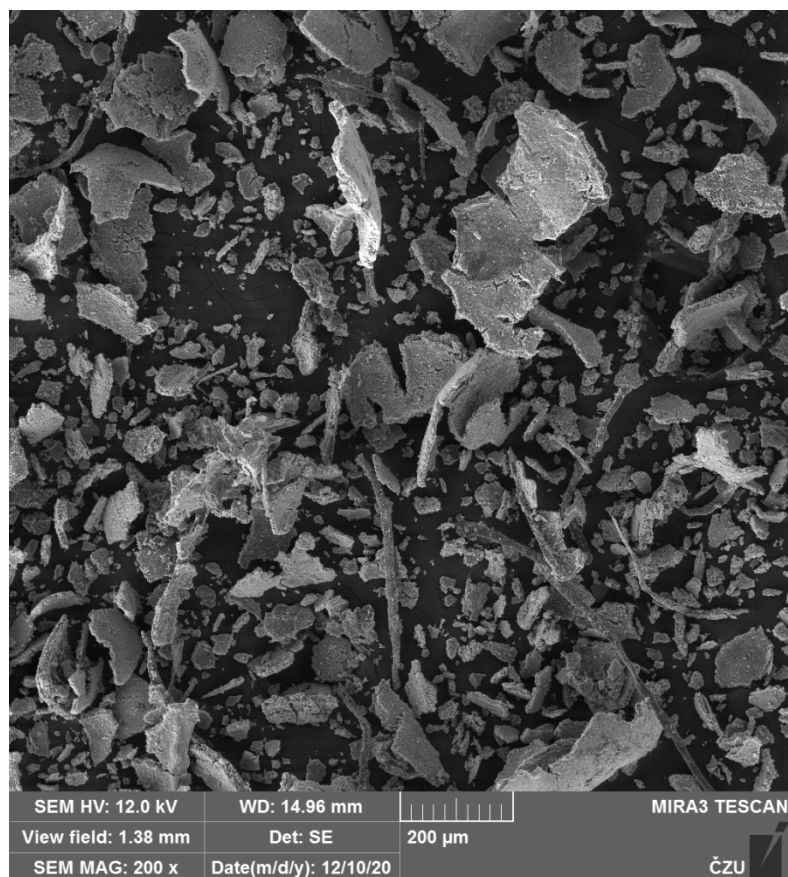

**Figure** SEM morphology

**Table** SEM-EDS analysis of the elemental composition of the filtration materials and amendments (wt%), n=10

|         | C      | O      | Na    | Al    | Si    | P     | Cl    | Ca    | Mn     |
|---------|--------|--------|-------|-------|-------|-------|-------|-------|--------|
| Average | 12.28% | 26.02% | 3.20% | 0.94% | 0.84% | 0.46% | 2.27% | 2.36% | 51.62% |
| SD      | 2.83%  | 3.61%  | 0.30% | 0.01% | 0.01% | 0.01% | 0.38% | 0.20% | 4.52%  |



**ESI9** Details on the XPS analysis of BioMnOx produced by *Pseudomonas putida* MnB6

|       | atom. % |
|-------|---------|
| C 1s  | 48.27   |
| Mn 2p | 7.38    |
| O 1s  | 38.28   |
| Cl 2p | 1.34    |
| Zn 2p | 0.39    |
| P 2p  | 0.70    |
| Na 1s | 2.63    |
| Ca 2p | 1.00    |

Full scan reveals that biogenic material contains mostly Mn, O and C.

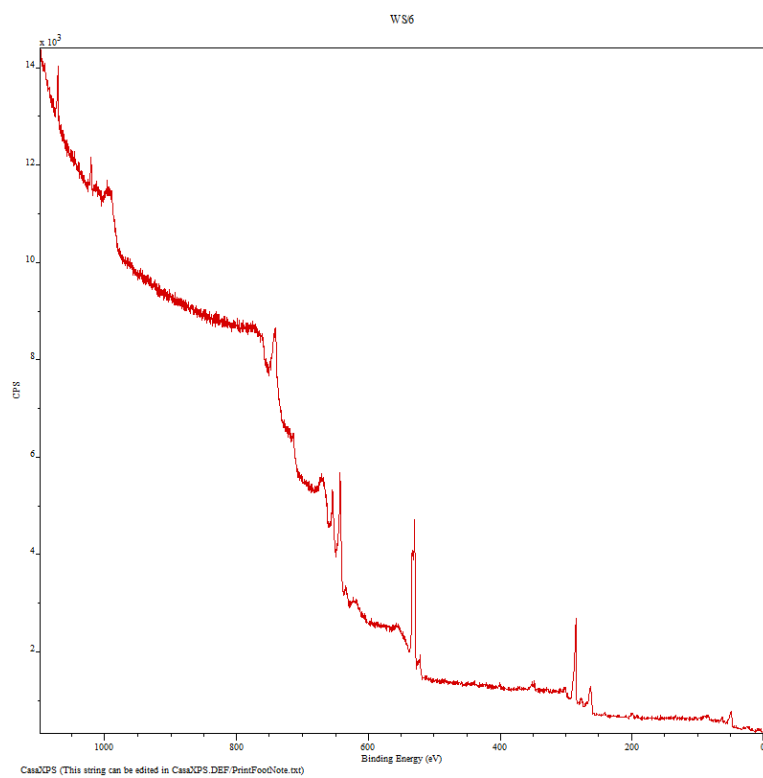

Mn 3s/5 before sputtering

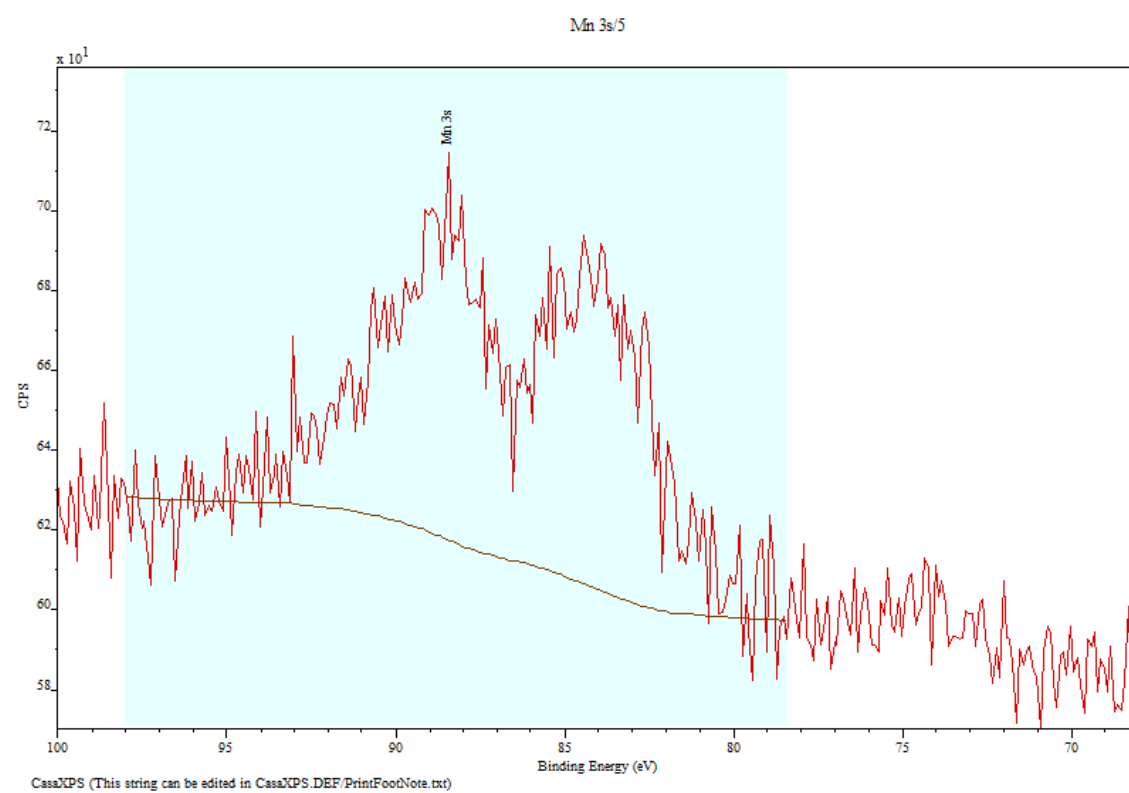

Mn 3s/5 after sputtering

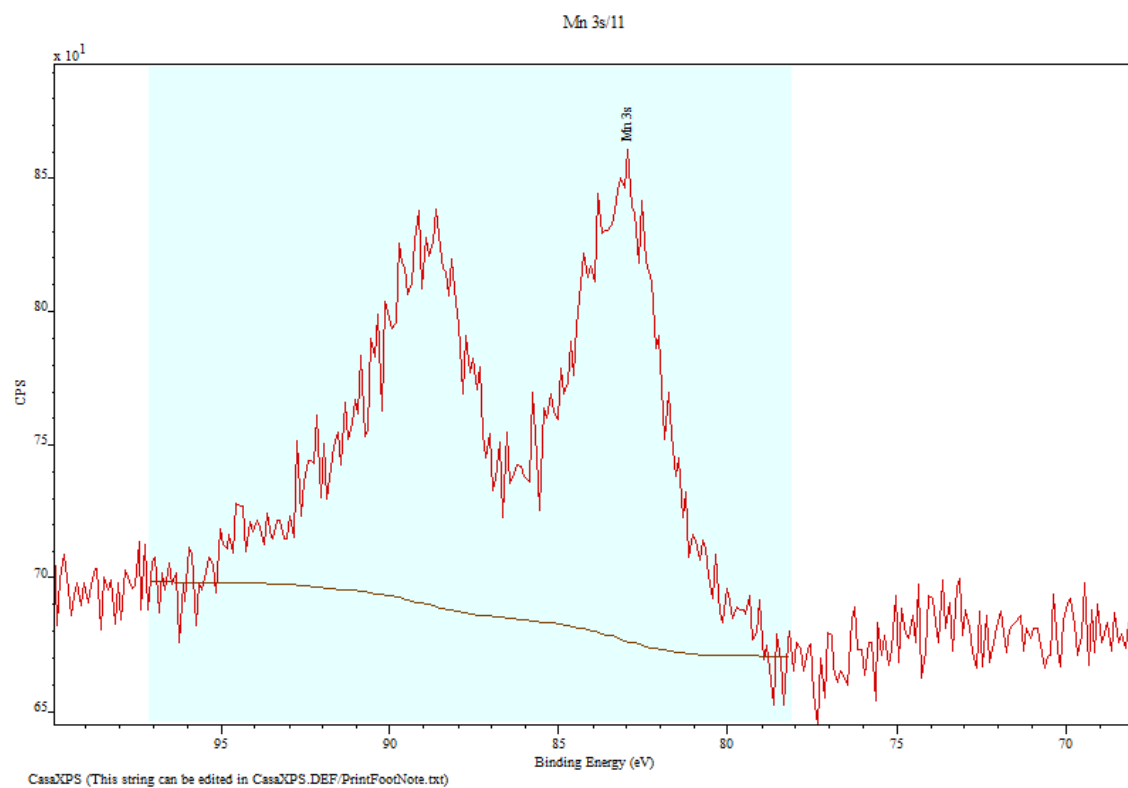

**ESI10** Removal ( $C_t/C_0$ ) of selected sulfonamides and diclofenac (positive control) in active cultures of *P. putida* MnB6 with peroxidized BioMnOx (Bio-Mn experiment) after time ( $t$ ) 48 h.

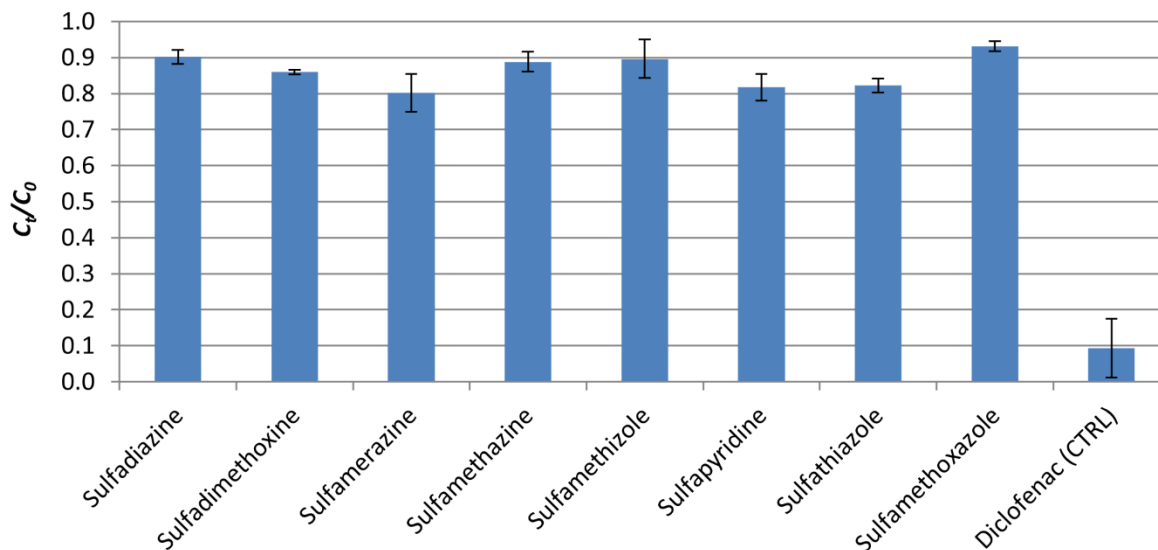

**ESI11** Improvements of the degradation of SMX, ISX and SNM in the presence of SAH

|          | SMX  | SNM  | ISX  |
|----------|------|------|------|
| Bio-Mn   | +26% | +58% | +27% |
| Bio-noMn | +6%  | +5%  | +13% |
| Abio-Mn  | +14% | +34% | +6%  |

**ESI12** First-order kinetics parameters in the Bio-Mn and Bio-Mn-SAH tests (for the SAH experiments without the decoupling period)

| Substance    | $k$ , 1/h | $SE$   | $t_{50\%}$ , h | $t_{99\%}$ , d | $R$   |
|--------------|-----------|--------|----------------|----------------|-------|
| SMX, w/o SAH | 0.001     | 0.0002 | 693            | 192            | 0.842 |
| SMX, w. SAH  | 0.029     | 0.0042 | 23.9           | 6.62           | 0.893 |
| ISX, w/o SAH | 0.001     | 0.0001 | 693            | 192            | 0.983 |
| ISX, w. SAH  | 0.065     | 0.0128 | 10.6           | 2.95           | 0.906 |
| SNM, w/o SAH | no fit    |        |                |                |       |
| SNM, w. SAH  | 0.174     | 0.0351 | 3.98           | 1.10           | 0.907 |
| SAH (alone)  | 0.452     | 0.0194 | 1.53           | 0.42           | 0.998 |

The parameters were determined using least squares non-linear regression (Levenberg-Marquardt estimation method in Software Statistica 14 (from Tibco Software Inc.).

**ESI13** The removal ( $C_t / C_0$ ) time profile of SAH in the Bio-Mn experiments with specific compounds SMX, SNM or ISX.

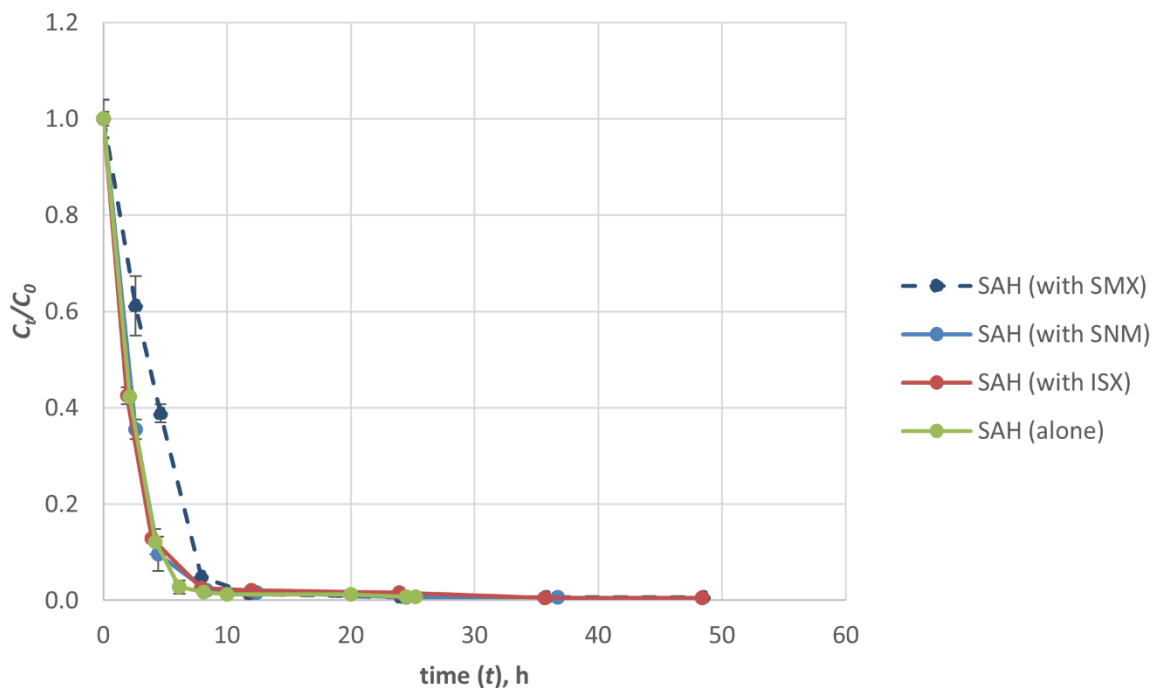

The removal ( $C_t/C_0$ ) of SAH in the Abio-Mn experiment was  $0.75 \pm 0.04$ , and in the Bio-noMn was  $0.009 \pm 0.001$ .

**ESI14** The removal ( $C_t/C_0$ ) time profile of dissolved Mn in the experiments with specific compounds SMX, SNM or ISX (in the presence or absence of SAH) and SAH alone

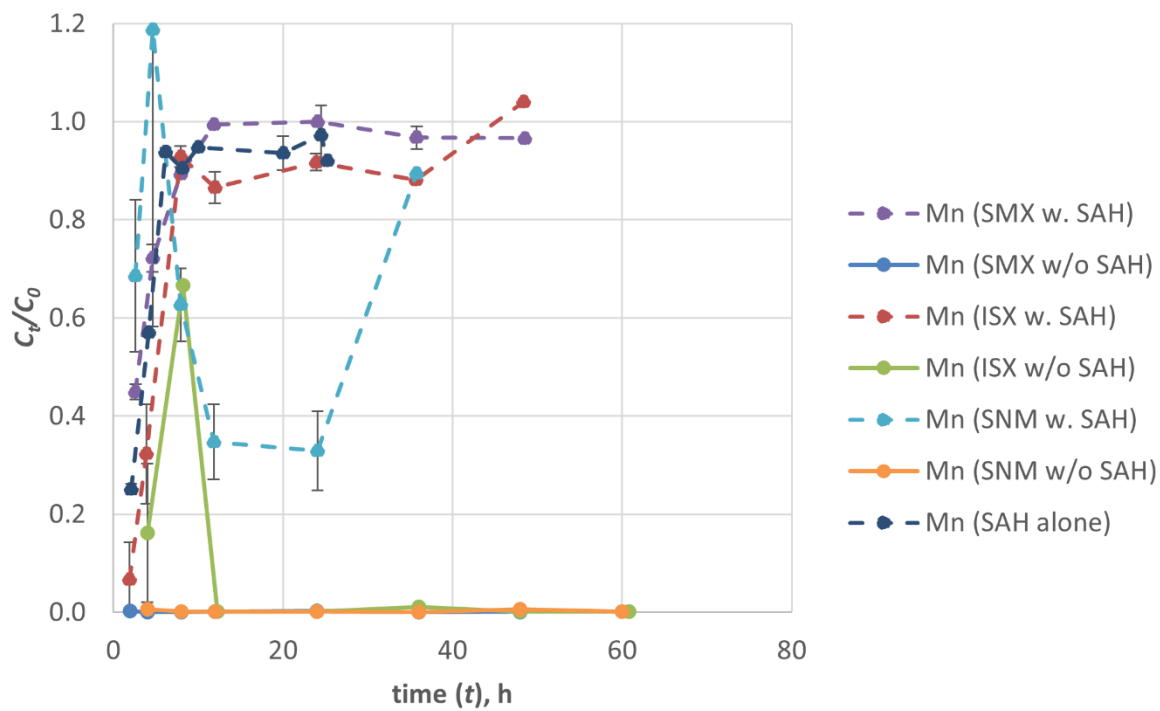

## ESI15 Transformation products of sulfamethoxazole (SMX)

| Symbol | Name                                                    | Transition ions/<br>product mass, $m/z$ | Ionisation mode | Proposed chemical structure                                                           | Reference             |
|--------|---------------------------------------------------------|-----------------------------------------|-----------------|---------------------------------------------------------------------------------------|-----------------------|
| TP244  | 4-amino-N-(1-hydroxyimino-2-oxaethyl)benzenesulfonamide | 245.0<br>217.0                          | ESI+            | 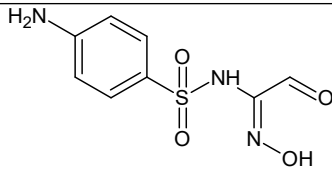   | Sochacki et al., 2021 |
| TP283  | 4-nitro-SMX                                             | 284.2<br>267.0                          | ESI+            |    | Sun et al., 2019      |
| TP295  | N4-acetyl-SMX                                           | 295.9<br>215.0;<br>249.9; 277.9         | ESI+            |   | Sochacki et al., 2021 |
| TP403  | SMX-DMBQ                                                | 403.9<br>243.0; 375.9                   | ESI+            |  | Song et al., 2019     |

|              |                            |                       |      |                                                                                                                                                                                                                                                                                                                                                                                                             |                     |
|--------------|----------------------------|-----------------------|------|-------------------------------------------------------------------------------------------------------------------------------------------------------------------------------------------------------------------------------------------------------------------------------------------------------------------------------------------------------------------------------------------------------------|---------------------|
| <b>TP417</b> | SMX-SAH                    | 417.9<br>362.0; 389.9 | ESI+ | 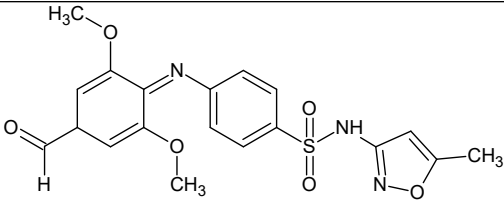 <p>The structure shows a 5-methoxy-2-(4-methoxyphenyl)-6-(3-methylisoxazol-5-ylsulfamoyl)benzaldehyde derivative. It features a central benzene ring with a methoxy group at position 5, a 4-methoxyphenyl group at position 2, and a 3-methylisoxazol-5-ylsulfamoyl group at position 6.</p>                           | Margot et al., 2015 |
| <b>TP430</b> | 7,8-Dihydropterin-SMX      | 431.1<br>311.1        | ESI+ |  <p>The structure shows a 7,8-dihydropterin derivative linked to a 3-methylisoxazol-5-ylsulfamoyl group via a methylene bridge. The pterin ring has an amino group at position 6 and a carbonyl group at position 4.</p>                                                                                                  | Xiong et al., 2020  |
| <b>TP518</b> | Hydroxyazosulfamethoxazole | 519.1<br>419.0; 373.1 | ESI+ |  <p>The structure shows a hydroxyazosulfamethoxazole derivative linked to a 3-methylisoxazol-5-ylsulfamoyl group via an azo bridge. The hydroxyazosulfamethoxazole part consists of a 5-methoxyisoxazole ring connected to a sulfamoyl group, which is further connected to a 4-hydroxyphenyl ring via an azo bridge.</p> | Yang et al., 2017   |



## ESI16 Transformation products of sulfanilamide (SNM)

| Symbol     | Name     | Transition ions/<br>product mass, $m/z$ | Ionisation mode | Proposed chemical structure                                                          | Reference |
|------------|----------|-----------------------------------------|-----------------|--------------------------------------------------------------------------------------|-----------|
| TP322(SNM) | SNM-DMBQ | 322.9<br>263.0; 295.0                   | ESI+            | 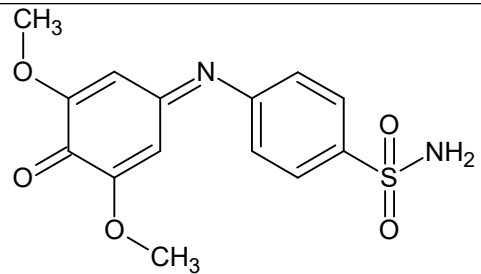  | This work |
| TP337(SNM) | SNM-SAH  | 338.2<br>303.2; 321.1                   | ESI+            |  | This work |

## ESI17 Transformation products of isoxazole (ISX)

| Symbol     | Name     | Transition ions/<br>product mass, $m/z$ | Ionisation mode | Proposed chemical structure                                                          | Reference |
|------------|----------|-----------------------------------------|-----------------|--------------------------------------------------------------------------------------|-----------|
| TP248(ISX) | ISX-DMBQ | 248.9<br>178.1; 221.1                   | ESI+            | 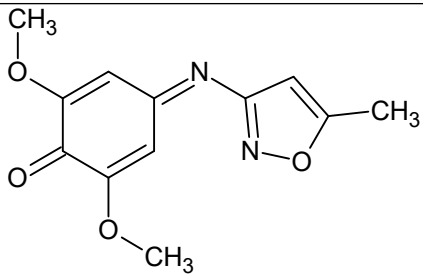  | This work |
| TP262(ISX) | ISX-SAH  | 263.0<br>207.0; 234.9                   | ESI+            |  | This work |

## References

- Kim, S., Chen, J., Cheng, T., Gindulyte, A., He, J., He, S., Li, Q., Shoemaker, B.A., Thiessen, P.A., Yu, B., Zaslavsky, L., Zhang, J., & Bolton, E. E. (2023). PubChem 2023 update. *Nucleic acids research*, 51(D1), D1373-D1380.
- Margot, J., Copin, P. J., von Gunten, U., Barry, D. A., & Holliger, C. (2015). Sulfamethoxazole and isoproturon degradation and detoxification by a laccase-mediator system: influence of treatment conditions and mechanistic aspects. *Biochemical Engineering Journal*, 103, 47-59.
- Sochacki, A., Kowalska, K., Felis, E., Bajkacz, S., Kalka, J., Brzeszkiewicz, A., Vaňková, Z., & Jakóbik-Kolon, A. (2021). Removal and transformation of sulfamethoxazole in acclimated biofilters with various operation modes—Implications for full-scale application. *Chemosphere*, 280, 130638.
- Song, Y., Jiang, J., Ma, J., Zhou, Y., & von Gunten, U. (2019). Enhanced transformation of sulfonamide antibiotics by manganese (IV) oxide in the presence of model humic constituents. *Water research*, 153, 200-207.
- Sun, F., Wu, D., Chua, F. D., Zhu, W., & Zhou, Y. (2019). Free nitrous acid (FNA) induced transformation of sulfamethoxazole in the enriched nitrifying culture. *Water research*, 149, 432-439.
- Villalobos, M., Toner, B., Bargar, J., & Sposito, G. (2003). Characterization of the manganese oxide produced by *Pseudomonas putida* strain MnB1. *Geochimica et Cosmochimica Acta*, 67(14), 2649-2662.

Xiong, Q., Liu, Y. S., Hu, L. X., Shi, Z. Q., Cai, W. W., He, L. Y., & Ying, G. G. (2020). Co-metabolism of sulfamethoxazole by a freshwater microalga *Chlorella pyrenoidosa*. *Water Research*, 175, 115656.

Yang, Y., Lu, X., Jiang, J., Ma, J., Liu, G., Cao, Y., ... & Luo, C. (2017). Degradation of sulfamethoxazole by UV, UV/H<sub>2</sub>O<sub>2</sub> and UV/persulfate (PDS): formation of oxidation products and effect of bicarbonate. *Water research*, 118, 196-207.
